# Supplementary material for: Evaluation of translucency, color stability, and surface roughness of advanced lithium silicate ceramics before and after thermocycling
Source: Research Square preprint supplement (doi:10.21203/rs.3.rs-7671595/v1), 2025-10-09
Supplement: Supplementary file 1 [file e5d853016c158af7bb66494a.docx]

**Tables**

**Table (1):** Two-way ANOVA test results.

| **Measurement** | **Parameter** | **Sum of squares (II)** | **df** | **Mean square** | **f-value** | **p-value** |
| --- | --- | --- | --- | --- | --- | --- |
| **Translucency (TP)** | ***Material*** | 479.58 | 2 | 239.79 | **6622.20** | **<0.001*** |
| ***Thermocycling*** | 24.55 | 1 | 24.55 | **1106.66** | **<0.001*** |
| ***Material* Thermocycling*** | 1.30 | 2 | 0.65 | **29.31** | **<0.001*** |
| **Surface roughness (Ra)** | ***Material*** | 0.00 | 2 | 0.00 | **0.802** | **0.471ns** |
| ***Thermocycling*** | 0.00 | 1 | 0.00 | **1.267** | **0.282ns** |

*Significant (p<0.05).

**Table (2):** Summary statistics and simple main effects comparisons for translucency values.

| **Material**  **Thermocycling** | **Translucency (TP) (Mean±SD)** | | | **f-value** | **p-value** |
| --- | --- | --- | --- | --- | --- |
| ***CEREC Tessera*** | ***Initial LiSi*** | ***Amber mill*** |
| **Non aged** | 14.71±0.19B | 11.39±0.15C | 19.24±0.21A | **3446.23** | **<0.001*** |
| **Aged** | 16.41±0.15B | 12.43±0.07C | 21.09±0.22A | **4128.94** | **<0.001*** |
| **f-value** | **322.36** | **128.55** | **376.87** |  |  |
| **p-value** | **<0.001*** | **<0.001*** | **<0.001*** |  |  |

Values with different superscripts within the same **horizontal row**  are significantly different *Significant (p<0.05)

**Table (3):** Summary statistics and main effects comparisons for color change.

| **Parameter** | | **Color change (ΔE) (Mean±SD)** | **f-value** | **p-value** |
| --- | --- | --- | --- | --- |
| **Material** | ***CEREC Tessera*** | 1.80±0.10C | **230.23** | **<0.001*** |
| ***Initial LiSi*** | 2.24±0.12B |
| ***Amber mill*** | 3.10±0.13A |

Values with different superscripts within the same **vertical column** are significantly different *Significant (p<0.05).

**Table (4):** Summary statistics and main effects comparisons for surface roughness.

| **Parameter** | | **Surface roughness**  **(Ra) (Mean±SD)** | **f-value** | **p-value** |
| --- | --- | --- | --- | --- |
| **Material** | ***CEREC Tessera*** | 0.2537±0.0014 | **0.802** | **0.471 ns** |
| ***Initial LiSi*** | 0.2534±0.0013 |
| ***Amber mill*** | 0.2537±0.0011 |
| **Thermocycling** | ***Non aged*** | 0.2537±0.0008 | **1.267** | **0.282 ns** |
| ***Aged*** | 0.2545±0.0020 |

*Significant (p<0.05).
